# Supplementary material
Source: PubMed Central journal article supplement (PMC6742437)
Supplement: NIHMS1531663-supplement-1.pdf [file NIHMS1531663-supplement-1.pdf]

## Supplementary Material

### Title

Brain network modularity predicts cognitive training-related gains in young adults

### Abbreviated Title

Network predictors of training gain

### Authors

Pauline L. Baniqued<sup>\*a,b</sup>, Courtney L. Gallen<sup>\*a,c,d</sup>, Michael B. Kranz<sup>b</sup>, Arthur F. Kramer<sup>b,e</sup>, Mark D'Esposito<sup>a</sup>

*\*Joint first authors*

### Affiliations

<sup>a</sup>Helen Wills Neuroscience Institute, University of California, Berkeley, Berkeley, California, USA 94720

<sup>b</sup>Beckman Institute for Advanced Science and Technology, University of Illinois at Urbana-Champaign, Urbana, Illinois, USA 61801

<sup>c</sup>Department of Neurology, University of California San Francisco, San Francisco, California, USA 94158

<sup>d</sup>Neuroscape, University of California San Francisco, San Francisco, California, USA 94158

<sup>e</sup>Psychology Department, Northeastern University, Boston, Massachusetts, USA 02115

### Corresponding author

Pauline L. Baniqued  
paulineb@berkeley.edu  
132 Barker Hall  
Berkeley, CA 94720

### 3.2.1 Baseline brain modularity and training-related gain

#### Correlations using the Power partition

|                                            | 2%             | 4%             | 6%            | 8%             | 10%            |
|--------------------------------------------|----------------|----------------|---------------|----------------|----------------|
| Brain modularity vs. training-related gain | R=.178, p=.073 | R=.205, p=.047 | R=.197 P=.054 | R=.198, p=.052 | R=.189, p=.061 |

#### Multiple regression analysis using other cost thresholds for spectral-derived modularity

|                    | Spectral: 4% |          | Spectral: 8% |          |
|--------------------|--------------|----------|--------------|----------|
|                    | <i>B</i>     | <i>p</i> | <i>B</i>     | <i>p</i> |
| Intercept          | 0.017        | 0.790    | 0.020        | 0.759    |
| Group              | 0.374        | <.001    | 0.377        | <.001    |
| Modularity         | -1.337       | 0.106    | -1.746       | 0.071    |
| Group x Modularity | 3.277        | 0.009    | 3.751        | 0.014    |

#### Multiple regression analysis for the Power partition

|                    | Power: 6% |          | Power: Mean (2-10%) |          |
|--------------------|-----------|----------|---------------------|----------|
|                    | <i>B</i>  | <i>p</i> | <i>B</i>            | <i>p</i> |
| Intercept          | 0.023     | 0.720    | 0.228               | 0.724    |
| Group              | 0.377     | <.001    | 0.377               | <.001    |
| Modularity         | -2.331    | 0.090    | -1.942              | 0.137    |
| Group x Modularity | 4.789     | 0.020    | 4.284               | 0.033    |

### **3.2.2 Baseline brain modularity, baseline cognition, and training-related gain**

#### ***Correlations using the spectral-derived partition***

|                                                                           | 2%                 | 4%                 | 6%                 | 8%                 | 10%                |
|---------------------------------------------------------------------------|--------------------|--------------------|--------------------|--------------------|--------------------|
| Brain modularity vs. baseline Gf (all)                                    | R=-.071,<br>p=.402 | R=-.102,<br>p=.226 | R=-.074,<br>p=.381 | R=-.081,<br>p=.339 | R=-.067,<br>p=.426 |
| Baseline modularity vs. baseline performance (all)                        | R=-.118,<br>p=.162 | R=-.158,<br>p=.060 | R=-.133,<br>p=.113 | R=-.087,<br>p=.304 | R=-.086,<br>p=.309 |
| Baseline modularity vs. training gain, c. baseline Gf (WM-REAS)*          | R=.106,<br>p=.197  | R=.237,<br>p=.027  | R=.236,<br>p=.027  | R=.181,<br>p=.071  | R=.198,<br>p=.054  |
| Baseline modularity vs. training gain, c. baseline performance (WM-REAS)* | R=-.070,<br>p=.287 | R=.036,<br>p=.385  | R=.038,<br>p=.379  | R=.010,<br>p=.469  | R=.026,<br>p=.417  |

*Note. \* denote one-tailed tests for follow-up analyses*

#### ***Correlations using the Power partition***

|                                                                           | 2%                 | 4%                 | 6%                 | 8%                 | 10%                |
|---------------------------------------------------------------------------|--------------------|--------------------|--------------------|--------------------|--------------------|
| Brain modularity vs. baseline Gf (all groups)                             | R=-.096,<br>p=.256 | R=-.137,<br>p=.103 | R=-.141,<br>p=.093 | R=-.140,<br>p=.096 | R=-.130,<br>p=.121 |
| Baseline modularity vs. baseline performance (all groups)                 | R=-.135,<br>p=.108 | R=-.126,<br>p=.133 | R=-.107,<br>p=.205 | R=-.098,<br>p=.244 | R=-.091,<br>p=.280 |
| Baseline modularity vs. training gain, c. baseline Gf (WM-REAS)*          | R=.147,<br>p=.118  | R=.164,<br>p=.093  | R=.151,<br>p=.112  | R=.150,<br>p=.113  | R=.141,<br>p=.128  |
| Baseline modularity vs. training gain, c. baseline performance (WM-REAS)* | R=.026,<br>p=.416  | R=.037,<br>p=.382  | R=.019,<br>p=.439  | R=.012,<br>p=.462  | R=-.003,<br>p=.490 |

*Note. \* denote one-tailed tests for follow-up analyses*

**Multiple regression analysis using other cost thresholds for spectral-derived modularity**

|                          | Spectral: 4% |          | Spectral: 8%+ |          |
|--------------------------|--------------|----------|---------------|----------|
|                          | <i>B</i>     | <i>p</i> | <i>B</i>      | <i>p</i> |
| Intercept                | 0.396        | <.001    | 0.395         | <.001    |
| Baseline Gf              | -0.253       | 0.010    | -0.239        | 0.017    |
| Modularity               | 1.474        | 0.115    | 1.437         | 0.224    |
| Baseline Gf x Modularity | -1.141       | 0.259    | -1.074        | 0.440    |

|                            | Spectral: 4% |          | Spectral: 8%+ |          |
|----------------------------|--------------|----------|---------------|----------|
|                            | <i>B</i>     | <i>p</i> | <i>B</i>      | <i>p</i> |
| Intercept                  | 0.349        | <.001    | 0.369         | <.001    |
| Baseline Perf              | -0.432       | <.001    | -0.491        | <.001    |
| Modularity                 | 0.660        | 0.385    | 0.267         | 0.774    |
| Baseline Perf x Modularity | -3.038       | 0.019    | -2.511        | 0.100    |

**Multiple regression analysis for the Power partition**

|                          | Power: 6% |          | Power: Mean (2-10%) |          |
|--------------------------|-----------|----------|---------------------|----------|
|                          | <i>B</i>  | <i>p</i> | <i>B</i>            | <i>p</i> |
| Intercept                | 0.385     | <.001    | 0.388               | <.001    |
| Baseline Gf              | -0.250    | 0.012    | -0.252              | 0.012    |
| Modularity               | 1.439     | 0.341    | 1.465               | 0.318    |
| Baseline Gf x Modularity | -2.733    | 0.150    | -2.422              | 0.184    |

|                            | Power: 6% |          | Power: Mean (2-10%) |          |
|----------------------------|-----------|----------|---------------------|----------|
|                            | <i>B</i>  | <i>p</i> | <i>B</i>            | <i>p</i> |
| Intercept                  | 0.372     | <.001    | 0.372               | <.001    |
| Baseline Perf              | -0.471    | <.001    | -0.468              | <.001    |
| Modularity                 | 0.586     | 0.631    | 0.556               | 0.640    |
| Baseline Perf x Modularity | -3.254    | 0.109    | -3.312              | 0.107    |

### **3.2.4. Controlling for in-scanner motion**

As in-scanner motion can spuriously affect functional connectivity estimates (Power et al., 2012; Satterthwaite et al., 2012; Van Dijk et al., 2012; Satterthwaite et al., 2013), we confirmed that the relationship between baseline modularity and training-related gains was not due to motion.

**Controlling for mean FD.** In both groups, controlling for mean FD in the correlation analyses and including it as a predictor in the regression analyses did not substantially change the relationship between baseline modularity and training gain, even when factoring in baseline Gf and baseline performance (see below). Also, controlling for mean FD did not alter the findings in the association network and segregation analyses.

*Baseline modularity:* Controlling for mean FD did not substantially change the relationship between baseline modularity and training gain in the WM-REAS group (6% cost:  $rp(65)=0.230$ ,  $p=0.030$ , one-tailed, BCa 95% CI [-0.040 0.459]) or the control group (6% cost:  $rp(72)=-0.196$ ,  $p=0.048$ , one-tailed, BCa 95% CI [-0.351 -0.024]). Moreover, adding mean FD as a predictor in the regression analysis with training group, modularity, and an interaction term of training group and modularity did not significantly improve model fit (6% cost:  $p(\Delta F)=0.480$ ).

*Baseline modularity and baseline Gf:* Including mean FD in the regression analysis did not improve model fit (6% cost:  $p(\Delta F)=0.420$ ).

*Baseline modularity and baseline performance:* Including mean FD in the regression analyses did not improve model fit (6% cost:  $p(\Delta F)=0.986$ ).

*Association network and segregation analyses:* Controlling for mean FD resulted in similar findings: training gain and association modularity ( $rp(65)=0.187$ ,  $p=.065$ , BCa 95% ci [-0.035, 0.394]); training gain and DMN modularity ( $rp(65)=0.229$ ,  $p=0.031$ , one-tailed, BCa 95% CI [-0.018 0.450]). Training gain was still not significantly correlated with whole-brain segregation and association network segregation even after controlling for mean FD.

**Results after motion censoring.** We re-analyzed this dataset after removing 9356 out of 25740 volumes across subjects (36% of total volumes excluded after 573 volumes were flagged with FD > 0.2 mm). Although as expected by the reduced power of our analyses with this smaller dataset, the magnitude of the statistical significance of most of the analyses we performed was reduced. However, the patterns of relationships in the WM-REAS group between modularity, baseline Gf, baseline performance and training gain did not change direction.

*Baseline modularity and baseline Gf:* The two-factor model was significant  $R^2=0.11$ , Adjusted  $R^2=0.08$ ,  $F(2,65)=3.82$ ,  $p=0.027$ , with baseline Gf as a significant predictor ( $\beta=-0.22$ ,  $p=0.019$ , BCa 95% CI [0-.41 -0.04]). Modularity was not a significant predictor ( $\beta=1.13$ ,  $p=0.258$ , BCa 95% CI [-1.30 3.51]), although the results were in the same direction as the results of the unscrubbed data. A model with an interaction term was not a better fit ( $p(\Delta F)=0.385$ ).

*Baseline modularity, baseline performance, and interaction term:* The three-factor model was significant,  $R^2=0.46$ , Adjusted  $R^2=0.43$ ,  $F(3,64)=18.13$ ,  $p<0.001$ . However, only baseline performance was a significant predictor ( $\beta=-0.52$ , BCa 95% CI [-0.66 -0.39],  $p<0.001$ ). Modularity ( $\beta=0.02$ ,  $p=0.978$ , BCa 95% CI [-1.74 1.86]) and the interaction of baseline performance and baseline modularity ( $\beta=-1.73$ ,  $p=0.161$ , BCa 95% CI [-3.77 1.11]) were not significant predictors, although both results were in the similar direction as the results from the unscrubbed data.

*Contributions of specific sub-networks to the relationship between global modularity and training gain.* Modularity quantified using the predefined modules (Power et al., 2011) was

correlated with modularity quantified using the spectral approach,  $r(66)=0.714$ ,  $p<0.001$ , BCa 95% CI [0.50 0.86]. A repeated-measures ANOVA with a within-subjects factor of module showed that modularity differed across the 12 modules,  $F(2.831,189.707)=290.404$ ,  $p(GG)<0.001$ ,  $\eta^2p=0.813$ ).

*Modularity in the association system networks (DMN, FP, CO, VAN, DAN, Sal) and training gain in WM-REAS group:* The correlation between association system modularity and training gain was significant,  $r(66)=.207$ ,  $p=.045$ , one-tailed BCa 95% CI [-0.008 0.403], while the correlation between sensory-motor system modularity and training gain was not significant,  $r(66)=.124$ ,  $p=.158$ , one-tailed BCa 95% CI [-0.109 0.348].

*DMN modularity and baseline task performance.* The correlation between training gain and DMN modularity was significant,  $r(66)=.270$ ,  $p=.013$ , one-tailed BCa 95% CI [0.033 0.467]. The three-factor model of baseline task performance, DMN modularity and interaction of baseline task performance and DMN modularity was significant,  $R^2=0.47$ , Adjusted  $R^2=0.44$ ,  $F(3,64)=18.86$ ,  $p<0.001$ , with baseline performance as a significant predictor ( $\beta=-0.49$ , BCa 95% CI [-0.65 -0.34],  $p<0.001$ ) and the interaction term as a near-significant predictor of training gain, ( $\beta=-5.58$ , BCa 95% CI [-11.95 0.08],  $p=0.079$ ). DMN modularity itself was not a significant predictor ( $\beta=-0.14$ , BCa 95% CI [-3.01 5.29],  $p=0.950$ ).
